# Supplementary material for: Nitrogen eutrophication particularly promotes turf algae in coral reefs of the central Red Sea
Source: PeerJ journal article supplement (doi:10.7717/peerj.8737), 2020-04-02

$\delta^{13}\text{C}$ 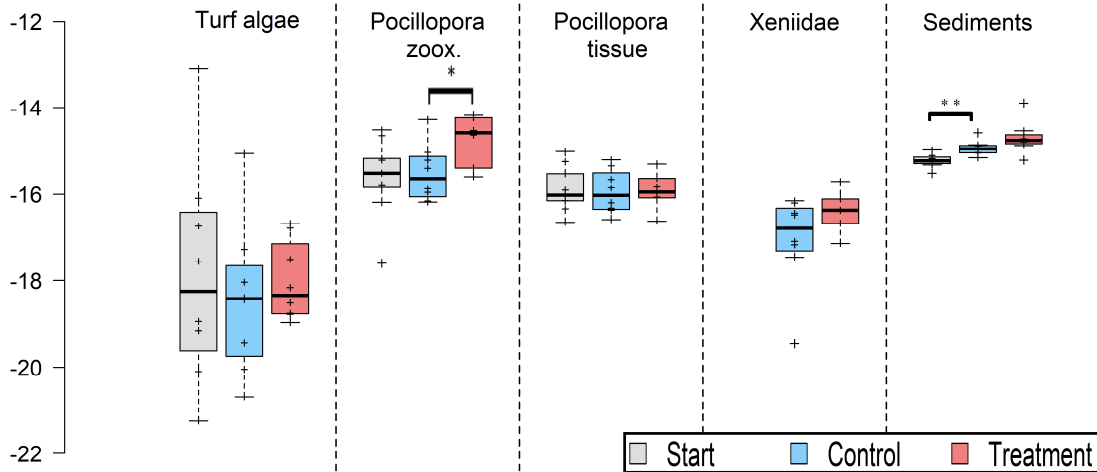

Supplement: Figure_S2.pdf [file Figure_S2.pdf]
